# Supplementary material
Source: Springer Nature journal article supplement (https://www.springermedizin.de/resource/supplementary/12936_2011_1744_MOESM2_ESM.pdf/9541652)

(A)

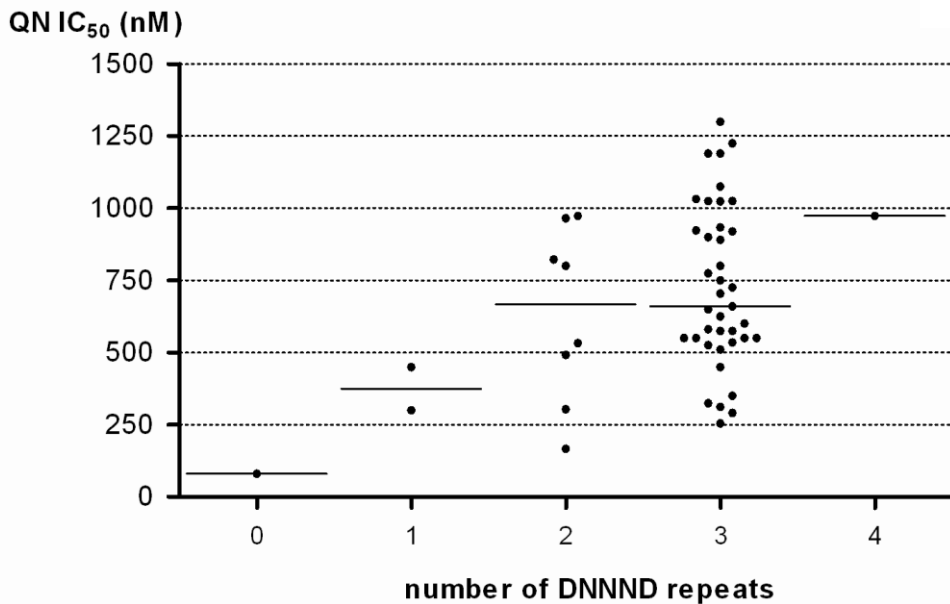

(B)

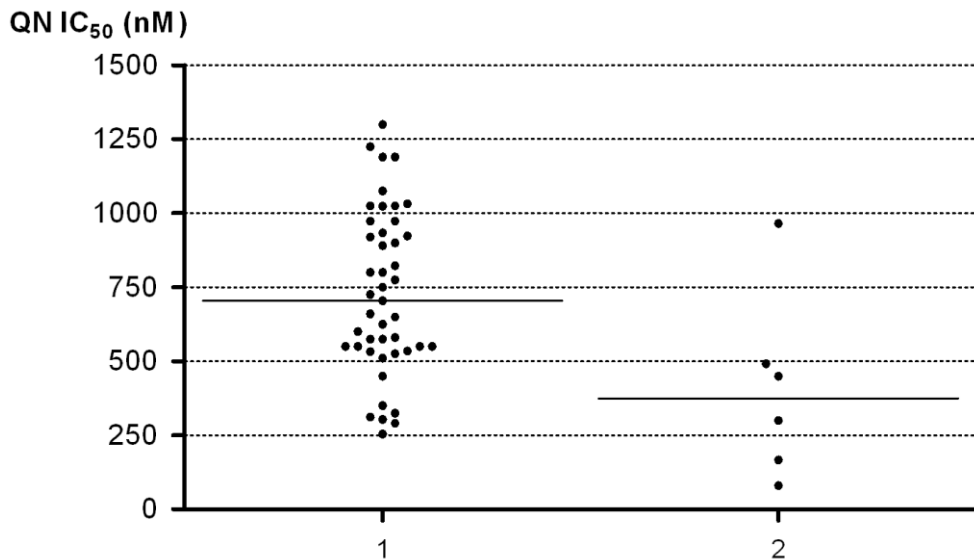

Supplement: MOESM2 [file 9541652]
